# Supplementary material for: A simple method for fabrication of microfluidic paper-based analytical devices and on-device fluid control with a portable corona generator
Source: Royal Society of Chemistry journal article supplement (doi:10.1039/c5ra23470k), 2015-12-22
Supplement: c5ra23470k1.pdf [file c5ra23470k1.pdf]

## ***Electronic Supplementary Information***

### **A Simple Method for Fabrication of Microfluidic Paper-Based Analytical Devices and on-device Fluid Control with a Portable Corona Generator**

**Yan Jiang<sup>1</sup>, Zhenxia Hao<sup>2</sup>, Qiaohong He<sup>1\*</sup>, Hengwu Chen<sup>1</sup>**

**1. Institute of Microanalytical Systems, Department of Chemistry, Zhejiang University, Zijin'gang Campus, Hangzhou 310058, China**

**2. Tea Research Institute, Chinese Academy of Agricultural Sciences, Hangzhou 310008, China**

\*Author to whom correspondence should be addressed; E-mail: heqh@zju.edu.cn;

Tel.: +86-571-88206773; Fax: +86-571-88273572

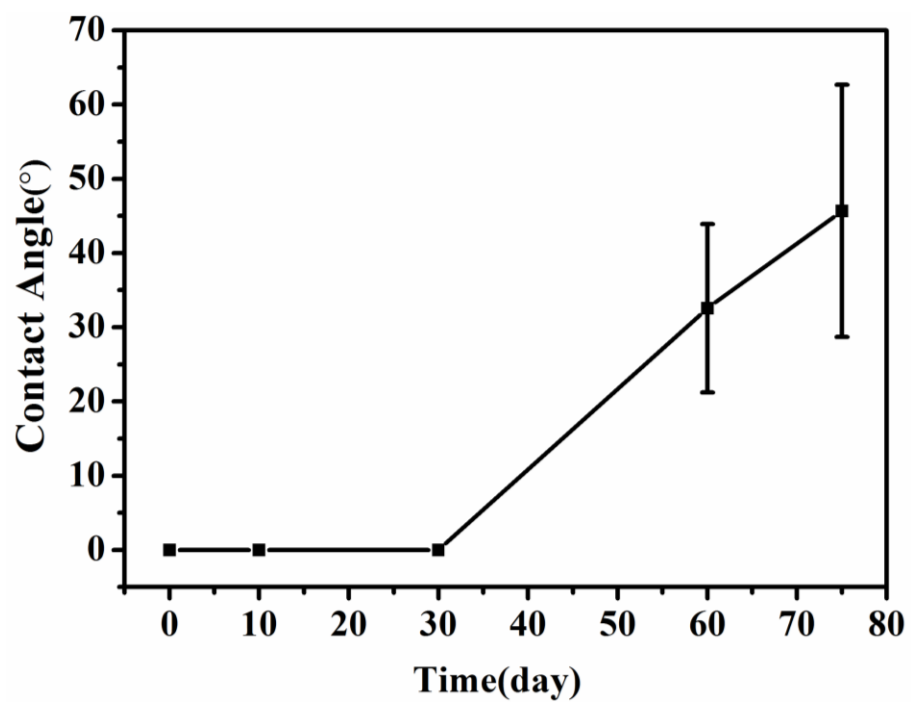

Fig. S-1 Water contact angles measured on the corona-treated OTS-paper sheets after they had been stored in a dryer for varied times (OTS-paper sheet size:  $2 \times 3 \text{ cm}^2$ , corona treated time: 60 s,  $n=6$ )

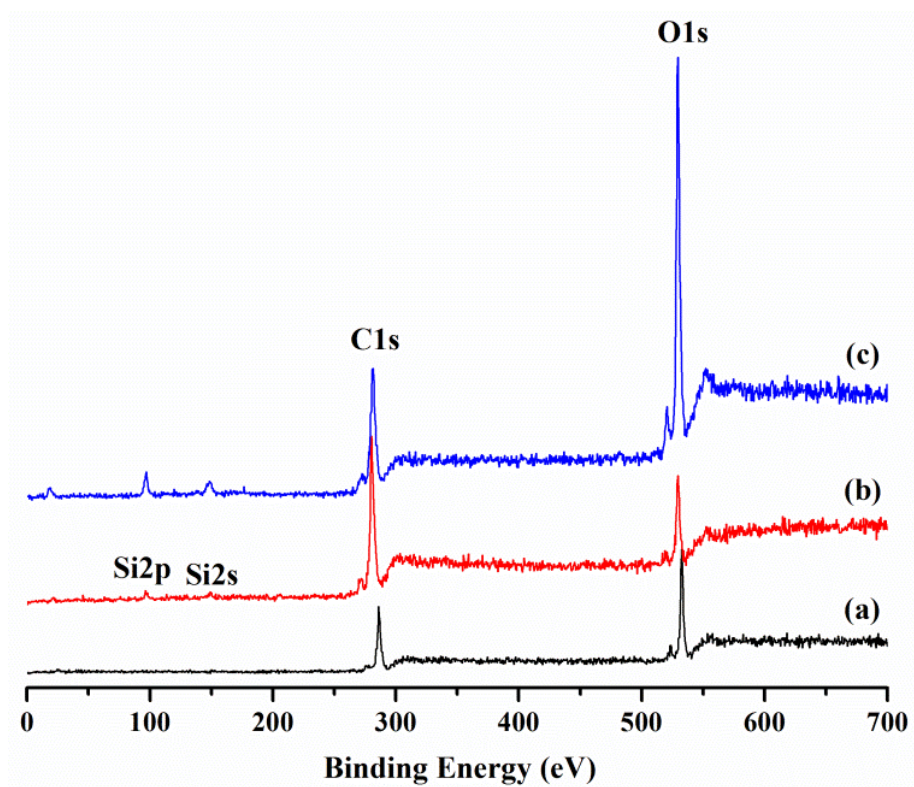

Fig. S-2 XPS spectra of (a) native paper, (b) OTS-paper and (c) corona treated OTS-paper.

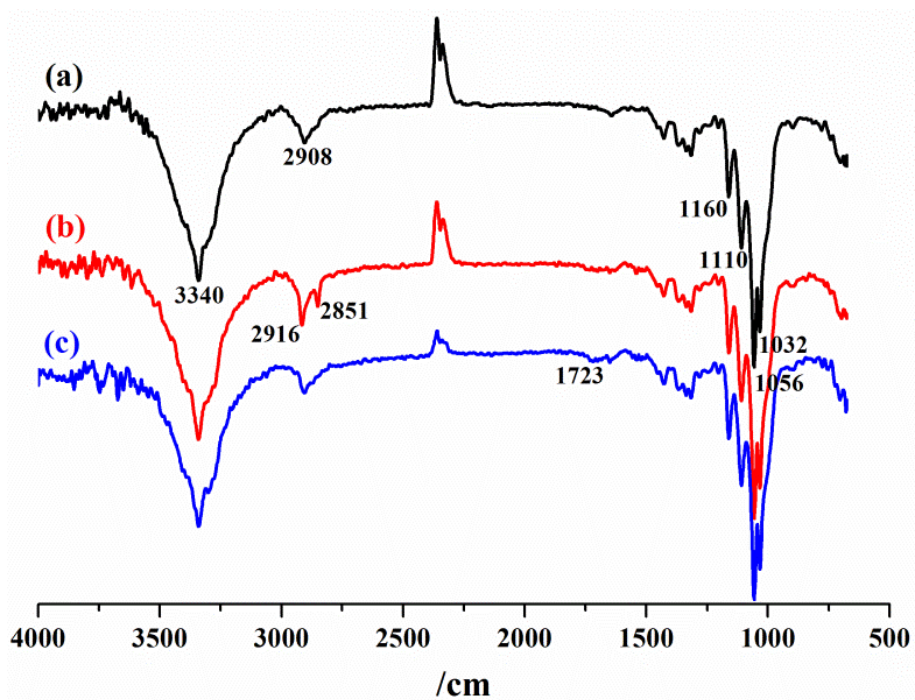

Fig. S-3 ATR-FT-IR spectra of (a) native paper, (b) OTS-paper and (c) corona treated OTS-paper.

### **Supplementary Video**

A movie recording the whole process of programmed acid-base reaction.
